# Supplementary material for: Synthesis, characterization, and biological activities of 2-phenylpyridine gold(iii) complexes with thiolate ligandsElectronic supplementary information (ESI) available: ESMS data. See http://www.rsc.org/suppdata/dt/b3/b307610e/
Source: Royal Society of Chemistry journal article supplement (doi:10.1039/b307610e), 2003-01-01

## Synthesis, Characterization, and Biological Activities of 2-Phenylpyridine Gold(III) Complexes with Thiolate Ligands

Daming Fan, Chang-Tong Yang, John D. Ranford, Jagadese J. Vittal and Peng Foo Lee

*Department of Chemistry, National University of Singapore, Singapore 117543.*

### Electronic Supplementary Information:

Fig. S1. ESMS of **2**

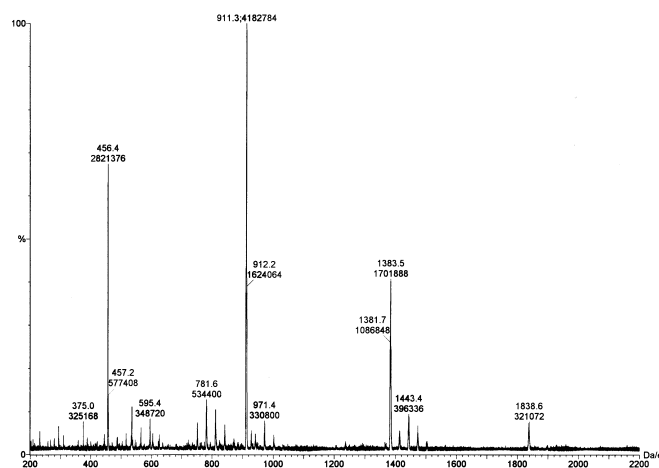

Fig. S2. ESMS of **3**

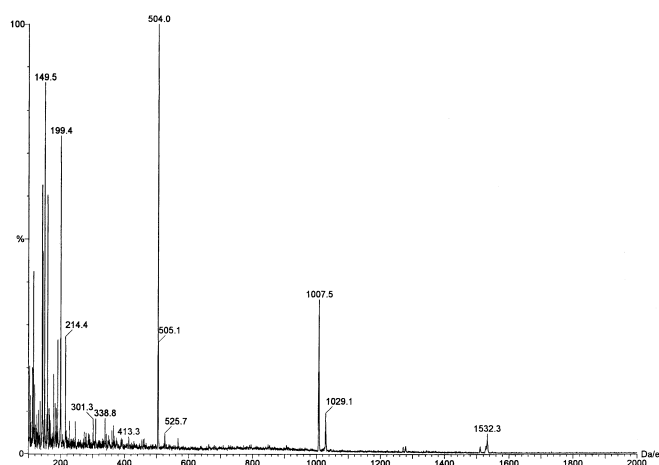

Supplement: b307610e.pdf [file b307610e.pdf]
